# Supplementary material for: Patient Screenings for Preconception Health Interventions at a Community Pharmacy
Source: MDPI journal article supplement (doi:10.3390/pharmacy8040181), 2020-10-05
Supplement: s1 [file s1]

# Young Women's Health Screening Form (For Women Up to Age 50)

## Section 1: Patient Information

Name \_\_\_\_\_ Today's Date \_\_\_\_\_

Age \_\_\_\_\_ Height \_\_\_\_\_ Weight \_\_\_\_\_

Email \_\_\_\_\_ Phone Number \_\_\_\_\_

BMI \_\_\_\_\_ Glucose Reading \_\_\_\_\_

Pharmacy \_\_\_\_\_ Health Insurance \_\_\_\_\_

-----

## Section 2: Medication History

Please check the following medications/supplements you are currently on:

- |                                                                 |                                        |                                        |
|-----------------------------------------------------------------|----------------------------------------|----------------------------------------|
| <input type="checkbox"/> Isotretinoin                           | <input type="checkbox"/> Diazepam      | <input type="checkbox"/> Topiramate    |
| <input type="checkbox"/> Folic Acid                             | <input type="checkbox"/> Gabapentin    | <input type="checkbox"/> Valproic Acid |
| <input type="checkbox"/> Levothyroxine                          | <input type="checkbox"/> Carbamazepine | <input type="checkbox"/> Felbamate     |
| <input type="checkbox"/> Warfarin                               | <input type="checkbox"/> Levetiracetam | <input type="checkbox"/> Phenobarbital |
| <input type="checkbox"/> Xarelto                                | <input type="checkbox"/> Lorazepam     | <input type="checkbox"/> Phenytoin     |
| <input type="checkbox"/> Thalidomide                            |                                        |                                        |
| <input type="checkbox"/> Other anti-seizure medications _____   |                                        |                                        |
| <input type="checkbox"/> Other blood thinning medications _____ |                                        |                                        |

Are you currently on birth control?

- No  Yes, I use: \_\_\_\_\_

## Section 3: Vaccination History

Please check all of the following vaccinations you've received and what year:

- |                                                                             |                                                                      |
|-----------------------------------------------------------------------------|----------------------------------------------------------------------|
| <input type="checkbox"/> Human Papilloma Virus (HPV) _____                  | <input type="checkbox"/> Influenza Virus (Flu Shot) _____            |
| <input type="checkbox"/> Measles, Mumps, Rubella (MMR) _____                | <input type="checkbox"/> Tetanus, Diphtheria, Pertussis (Tdap) _____ |
| <input type="checkbox"/> Varicella (Chickenpox) or chickenpox disease _____ |                                                                      |

## Section 4: Medical History

Please check all of the following medical conditions you have been diagnosed with:

- |                                                           |                                                       |
|-----------------------------------------------------------|-------------------------------------------------------|
| <input type="checkbox"/> HIV/AIDS                         | <input type="checkbox"/> Hepatitis B                  |
| <input type="checkbox"/> Diabetes                         | <input type="checkbox"/> Maternal Phenylketonuria     |
| <input type="checkbox"/> Thyroid Disease                  | <input type="checkbox"/> Obesity                      |
| <input type="checkbox"/> Folic Acid Deficiency            | <input type="checkbox"/> Severe Depression            |
| <input type="checkbox"/> STI (Chlamydia, Gonorrhea, etc.) | <input type="checkbox"/> Eating Disorder              |
| <input type="checkbox"/> Hypertension                     | <input type="checkbox"/> Arthritis                    |
| <input type="checkbox"/> Seizure Disorder                 | <input type="checkbox"/> Schizophrenia                |
| <input type="checkbox"/> Bipolar Disorder                 | <input type="checkbox"/> Other Chronic Disease: _____ |
